# Supplementary material
Source: PubMed Central journal article supplement (PMC10163085)
Supplement: 125_2023_5893_MOESM1_ESM.pdf [file 125_2023_5893_MOESM1_ESM.pdf]

## Electronic supplementary material (ESM)

ESM Table 1. End criteria for maximal exercise testing.

|                                    | <b>n = 18</b> |
|------------------------------------|---------------|
| Lactate <sub>post</sub> (mmol/l)   | 11.26 ± 3.79  |
| RER (ratio)                        | 1.15 ± 0.05   |
| VO <sub>2-diff</sub> (ml/min)      | 82 ± 88       |
| HR <sub>max-pred</sub> (beats/min) | 182 ± 9       |
| HR <sub>max-test</sub> (beats/min) | 178 ± 16      |
| HR <sub>max-diff</sub> (beats/min) | 4 ± 10        |

Lactate<sub>post</sub>: venous lactate concentration after the test, RER: respiratory exchange ratio, VO<sub>2-diff</sub>: difference in mean oxygen consumption between the last and before last half-minute of the test, HR<sub>max-pred</sub>: predicted maximum heart according to Tanaka, HR<sub>max-test</sub>: heart rate at the end of the test, HR<sub>max-diff</sub>: difference between the predicted maximum heart and heart rate at the end of the test. Data are presented as mean±SD

ESM Table 2. Glycaemic parameters after the exercise test based on the predefined day and night period.

|                                                         | CON         | D40                   | D20-P                   |
|---------------------------------------------------------|-------------|-----------------------|-------------------------|
| <b>1<sup>st</sup> night after the exercise test</b>     |             |                       |                         |
| Mean glucose concentration                              | 8.7 ± 0.6   | 8.5 ± 0.6             | 9.6 ± 0.7               |
| Time below range                                        | 0 [0-0]     | 0 [0-0]               | 0 [0-0]                 |
| Time in range                                           | 256 ± 26    | 287 ± 26              | 229 ± 30 <sup>†</sup>   |
| Time above range                                        | 98 ± 27     | 72 ± 27               | 124 ± 31                |
| Hypoglycaemic events                                    | 3           | 1                     | 1                       |
| <b>1<sup>st</sup> whole day after the exercise test</b> |             |                       |                         |
| Mean glucose concentration                              | 8.5 ± 0.4   | 8.7 ± 0.5             | 9.6 ± 0.5 <sup>*†</sup> |
| Time below range                                        | 18 [0-55]   | 0 [0-23] <sup>*</sup> | 0 [0-16]                |
| Time in range                                           | 1041 ± 62   | 1029 ± 70             | 824 ± 74 <sup>*†</sup>  |
| Time above range                                        | 364 ± 66    | 385 ± 72              | 584 ± 81 <sup>*†</sup>  |
| Hypoglycaemic events                                    | 11          | 8                     | 10                      |
| <b>2<sup>nd</sup> whole day after the exercise test</b> |             |                       |                         |
| Mean glucose concentration                              | 9.8 ± 0.5   | 9.5 ± 0.5             | 8.6 ± 0.5 <sup>*</sup>  |
| Time below range                                        | 5 [0-44]    | 0 [0-41]              | 28 [4-46] <sup>†</sup>  |
| Time in range                                           | 892 ± 78    | 902 ± 92              | 966 ± 64                |
| Time above range                                        | 528 ± 82    | 509 ± 94              | 394 ± 70                |
| Hypoglycaemic events                                    | 13          | 9                     | 20 <sup>†</sup>         |
| <b>Total 6 days after the exercise test</b>             |             |                       |                         |
| Mean glucose concentration                              | 9.5 ± 0.4   | 9.4 ± 0.4             | 9.2 ± 0.4               |
| Time below range                                        | 38 [15-164] | 45 [19-230]           | 95 [40-370]             |
| Time in range                                           | 5345 ± 371  | 5433 ± 435            | 5338 ± 321              |
| Time above range                                        | 3110 ± 406  | 2729 ± 417            | 2938 ± 355              |
| Hypoglycaemic events                                    | 61          | 58                    | 91                      |

Mean glucose concentration in mmol/l, times ranges in minutes, hypoglycaemic events as total count. CON, no dose adjustment; D40, 40% dose reduction; D20-P, postponement and 20% dose reduction. \*p<0.05 vs CON; †p<0.05 vs D40. Data are presented as mean±SEM, median[IQR] or total count (n).

ESM Table 3. Glycaemic parameters after the exercise test based on the actual sleep times.

|                                                         | CON         | D40         | D20-P           |
|---------------------------------------------------------|-------------|-------------|-----------------|
| <b>1<sup>st</sup> night after the exercise test</b>     |             |             |                 |
| Mean glucose concentration                              | 8.5 ± 0.5   | 8.9 ± 0.7   | 9.8 ± 0.8*      |
| Time below range                                        | 0 [0-4]     | 0 [0-0]     | 0 [0-0]         |
| Time in range                                           | 376 ± 35    | 366 ± 46    | 255 ± 44*†      |
| Time above range                                        | 115 ± 34    | 142 ± 46    | 199 ± 45        |
| Hypoglycaemic events                                    | 5           | 1           | 1               |
| <b>1<sup>st</sup> whole day after the exercise test</b> |             |             |                 |
| Mean glucose concentration                              | 8.4 ± 0.4   | 8.8 ± 0.5   | 9.6 ± 0.5*      |
| Time below range                                        | 18 [0-55]   | 0 [0-26]*   | 3 [0-35]        |
| Time in range                                           | 1053 ± 64   | 1023 ± 70   | 853 ± 73*†      |
| Time above range                                        | 355 ± 69    | 387 ± 71    | 552 ± 81*†      |
| Hypoglycaemic events                                    | 11          | 8           | 10              |
| <b>2<sup>nd</sup> whole day after the exercise test</b> |             |             |                 |
| Mean glucose concentration                              | 9.7 ± 0.5   | 9.4 ± 0.5   | 8.5 ± 0.5*      |
| Time below range                                        | 5 [0-44]    | 0 [0-41]    | 28 [4-65]*†     |
| Time in range                                           | 912 ± 80    | 943 ± 97    | 998 ± 71        |
| Time above range                                        | 555 ± 85    | 504 ± 99    | 396 ± 77        |
| Hypoglycaemic events                                    | 13          | 10          | 20 <sup>†</sup> |
| <b>Total 6 days after the exercise test</b>             |             |             |                 |
| Mean glucose concentration                              | 9.4 ± 0.4   | 9.2 ± 0.4   | 9.1 ± 0.4       |
| Time below range                                        | 38 [15-164] | 45 [19-231] | 98 [40-366]     |
| Time in range                                           | 5337 ± 372  | 5429 ± 435  | 5334 ± 320      |
| Time above range                                        | 3110 ± 406  | 2730 ± 417  | 2938 ± 355      |
| Hypoglycaemic events                                    | 60          | 57          | 92              |

Mean glucose concentration in mmol/l, times ranges in minutes, hypoglycaemic events as total count. CON, no dose adjustment; D40, 40% dose reduction; D20-P, postponement and 20% dose reduction. \*p<0.05 vs CON; †p<0.05 vs D40. Data are presented as mean±SEM, median[IQR] or total count (n).

ESM Fig. 1

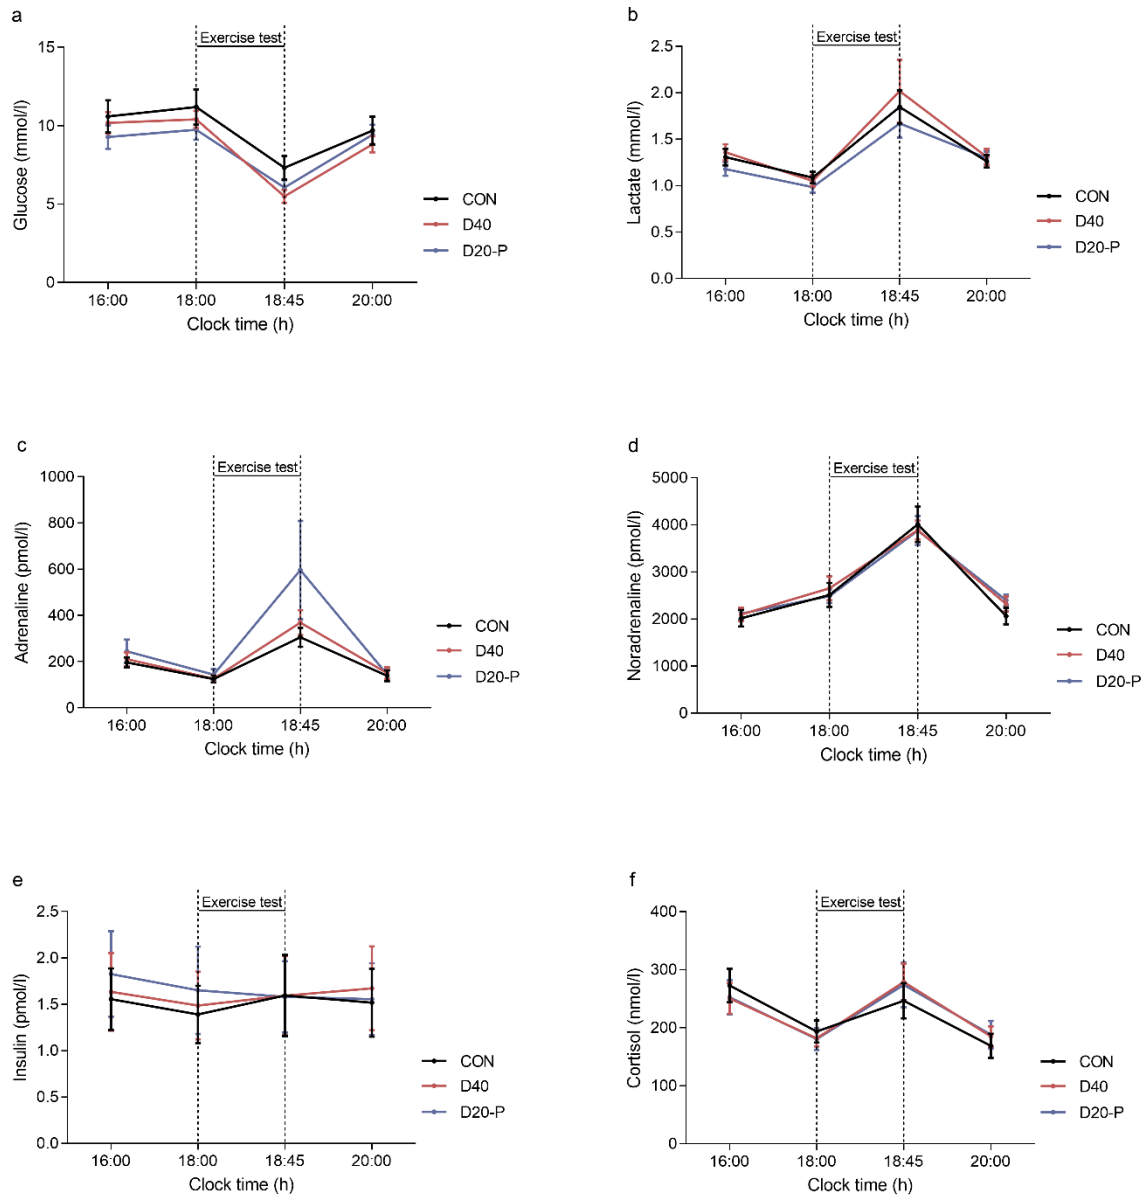

ESM Fig. 1. Concentration of glucose (a), lactate (b), adrenaline (c), noradrenaline (d), insulin (e) and cortisol (f) upon arrival (at 16:00h), before the exercise test (at 18:00h), after the exercise test (at 18.45h) and before discharge (at 20.00h), according to insulin degludec dosing regimen. CON, no dose adjustment (black); D40, 40% dose reduction (red); D20-P, postponement and 20% dose reduction (blue). Values are given as mean $\pm$ SEM.

ESM Fig. 2

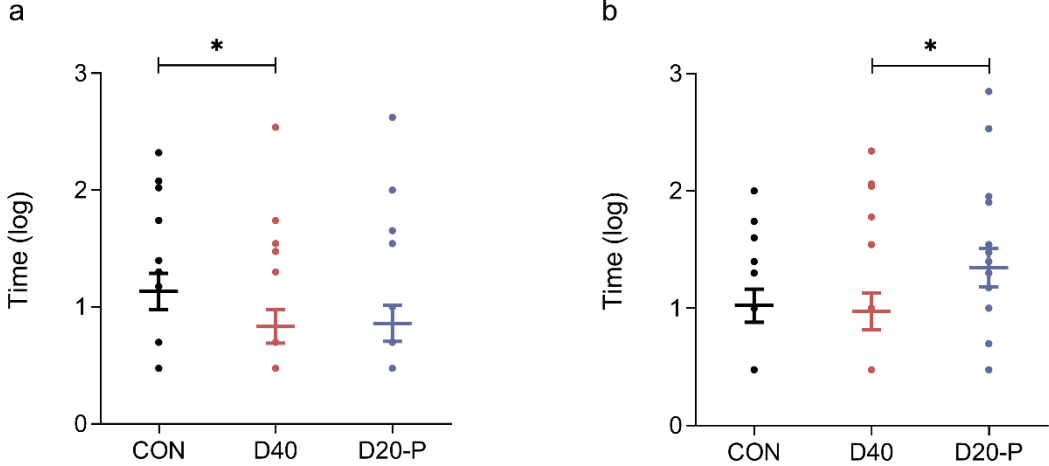

ESM Fig. 2. Time spent below range in minutes during the first (a) and second day (b) after the exercise test, according to insulin degludec dosing regimen. CON, no dose adjustment (black); D40, 40% dose reduction (red); D20-P, postponement and 20% dose reduction (blue). Values are given as individual numbers after log transformation. Bars represent mean±SEM. \*Indicates p<0.05.

**ESM Fig. 3**

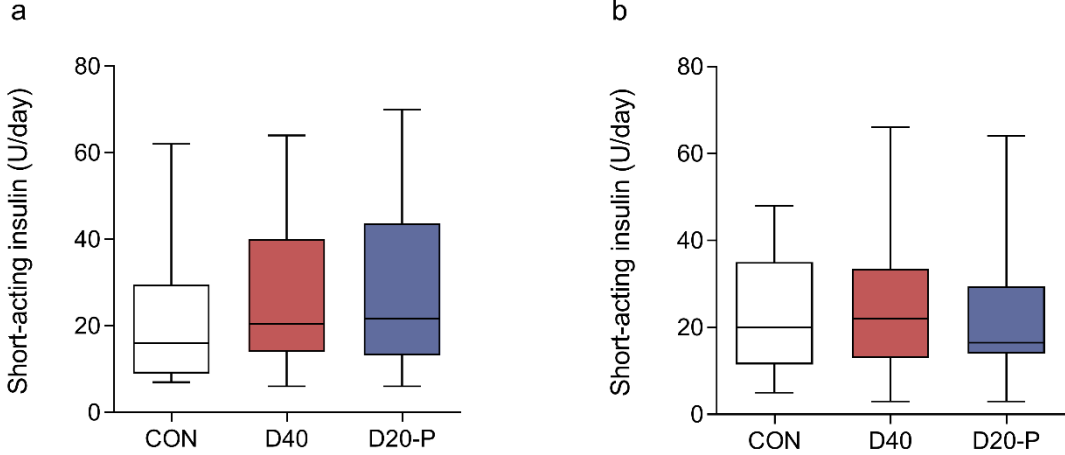

ESM Fig. 3. Total amount of short-acting insulin used on the first (a) and second day after the exercise test (b), according to insulin degludec dosing regimen. CON, no dose adjustment (white); D40, 40% dose reduction (red); D20-P, postponement and 20% dose reduction (blue). Values are given as median and interquartile range with minimum and maximum.
